# Supplementary material
Source: ML conference proceedings conference paper supplement (https://openreview.net/forum?id=QL3J1fyAFv)
Supplement: supplementary_material [file Length_Generalization_Theory_Full.pdf › Length_Generalization_Theory_Full.pdf]

---

# Length Generalization via Auxiliary Tasks

---

Anonymous Author(s)

Affiliation

Address

email

## Abstract

Length generalization, the ability of sequence models to generalize to sequences longer than those encountered during training, remains a fundamental challenge for Transformers, especially in tasks requiring algorithmic reasoning. Existing theoretical understanding of length generalization is limited, often providing asymptotic results or focusing on specific problem classes or architectural variants; empirical solutions frequently rely on ad-hoc and often fragile techniques.

In this work we introduce a novel framework for analyzing and proving length generalization bounds under specified, verifiable assumptions. A key outcome of the theory is the identification of a natural set of auxiliary tasks, intricately related to the primary task structure, such that strong performance on these auxiliary tasks, alongside the primary task, provably guarantees length generalization within the framework. This motivates a multi-task training procedure that explicitly optimizes performance on both the primary and the identified auxiliary tasks. Empirical evaluations on a variety of synthetic benchmarks known to be challenging for length generalization, including sequence sorting, and reversal, demonstrate that the proposed method yields significant improvements in generalization to substantially longer sequences.

## 1 Introduction

Transformer architectures (Devlin et al., 2019; Vaswani et al., 2017) have become the cornerstone of modern sequence modeling, achieving state-of-the-art performance across a vast range of applications. However, a persistent and critical limitation is their often poor performance on length generalization—the ability to process sequences at test time that are significantly longer than those seen during training (Anil et al., 2022; Kazemnejad et al., 2023; Press et al., 2022; Tay et al., 2021). This deficiency is particularly evident in tasks demanding algorithmic reasoning or extrapolation, such as multi-digit arithmetic, symbolic manipulation, or processing long documents (Saxton et al., 2019; Zhou et al., 2024b). The failure to robustly generalize beyond the training length distribution not only limits practical applications, but also casts doubt on whether these models are truly learning underlying algorithms, or merely performing sophisticated pattern matching within a constrained length range. Despite considerable research effort, achieving reliable length generalization remains a fundamental open problem (Nye et al., 2021; Saxton et al., 2019; Zhao et al., 2024).

Efforts to address length generalization have yielded mixed results. Empirically, various techniques have been proposed, often involving modifications to positional encodings (PEs) (Anil et al., 2022; Saxton et al., 2019) or attention mechanisms. More recent works have found highly specialized PEs like FIRE (Li et al., 2024) or position coupling (Cho et al., 2024; McLeish et al., 2024) essential for tasks like addition. However, it has remained difficult to draw clear lessons from these works about when and why they work; moreover, the resulting length generalization can be fragile, highly sensitive to factors like data formatting (e.g., reversed sequences, index hints for addition), scratchpad formats, random weight initialization, and training data order. This fragility raises the question of

whether these empirical fixes are merely learning task-specific shortcuts rather than inducing robust and generalizable algorithmic capabilities.

There have been several theoretical investigations into length generalization and how to boost performance, (e.g., see Ahuja and Mansouri (2024); Huang et al. (2025); Sabbaghi et al. (2024); Zhou et al. (2024a)), but our understanding remains limited. The most relevant works are ones that suggest sparsity as being a critical feature for length generalization, e.g., Golowich et al. (2025); Huang et al. (2025); Sabbaghi et al. (2024); we compare our work to these works in Section 1.1.

**Our results.** We propose a novel framework for studying length generalization in Transformers. In more detail:

1. We present a general theoretical framework to study length generalization. Rather than specializing to particular tasks or training procedures, we aim for broad applicability and focus on the class of sparse tasks: loosely speaking, these are tasks where each output token depends the presence of a small number of preceding tokens. (We formally define sparsity in Section 2.1.)

2. We show that robust performance at small training lengths implies generalization for such sparse tasks. Formally, our theoretical result considers input distributions  $\{\mathcal{D}_k\}_{k \in \mathbb{Z}_+}$ , where  $\mathcal{D}_k$  is a distribution over length- $k$  input sequences. We show that if the transformer model is “robustly” correct (with error at most  $\varepsilon$  and large margin) on sequences of length  $n$ , then it has error  $\varepsilon \cdot N/n$  on sequences of length  $N \gg n$ —i.e., the error increases only linearly in the sequence length. Here “robust” correctness at length  $n$  means that the error of the model is less than  $\varepsilon$ , not only on sequences drawn from  $\mathcal{D}_n$ , but also on suitable  $n$ -length random restrictions of sequences drawn from  $\mathcal{D}_N$ . (See the notion of  $(N, n)$ -perturbations and robustness in Section 2.1.)

3. The framework is not just descriptive, it also prescribes a new robust training procedure. The results identify being robustly correct as desirable: one way to ensure robust correctness at length  $n$  is to actually train the model on both the “native” distribution  $\mathcal{D}_n$ , and also on random  $n$ -length restrictions of  $\mathcal{D}_N$ . (We call this “robust training”.) It is well-known that training on just  $\mathcal{D}_n$  leads to poor length generalization, so our hope is that training on these random restrictions will lead to the model being robustly correct and hence length generalize, due to our formal results.

4. We then empirically validate our approach: we conduct experiments on several tasks. These include commonly studied synthetic tasks such as sorting and reversal. We also introduce new tasks including a SLiM task aimed to capture a toy language modeling scenario. Our results show that performing robust training at length  $n$  leads to good performance at length  $N \gg n$ .

The structure of the paper is as follows: after reviewing related work in Section 1.1, we present the theoretical framework in Section 2. Our length generalization result is given in Section 3, showing how robust correctness implies length generalization. Section 4 then presents our robust training process inspired by the theory, and gives the results of our experiments. Finally, we end with discussion and future directions in Section 5.

## 1.1 Related Work

**Empirical Work.** Empirical studies have consistently shown that Transformers exhibit mixed success in length generalization (Duan et al., 2023; Jelassi et al., 2023). While proficient at many sequence tasks, they often fail dramatically when tested on sequences longer than those seen during training, particularly on algorithmic tasks like multi-digit addition (Cho et al., 2024), sorting (Lee et al., 2024), sequence reversal, parity checking (Zhou et al., 2024b), and ListOps (Nangia and Bowman, 2018). These tasks serve as crucial benchmarks because their underlying algorithms possess inherent recursive structures that models should ideally learn to apply, irrespective of length.

There is much work on the role of *Positional Encoding (PE)*. Relative PEs were initially favored over absolute ones (Wang et al., 2024a), but subsequent works gave conflicting evidence. Some found that removing explicit PEs entirely (NoPE) could yield better length generalization on certain downstream tasks (Wang et al., 2024a) whereas others showed that highly task-specific PE schemes, such as FIRE (Li et al., 2024) or position coupling (assigning identical position IDs to structurally related tokens) (Cho et al., 2024; McLeish et al., 2024), helped achieve length generalization on tasks like addition.

Data formatting and representation also play a critical role. Techniques like reversing the sequence order for addition (Lee et al., 2024; Li et al., 2024), giving explicit index hints within input/output sequences, or using intermediate scratchpads or Chain-of-Thought (CoT) reasoning steps (Merrill and Sabharwal, 2024) can dramatically improve length generalization on specific tasks. However, scratchpads are not universally effective, but instead very task-dependent, highly sensitive to the specific format used, and may not help if the underlying PE is not conducive to generalization. Other empirical approaches include modifications to the attention mechanism itself (Fan et al., 2024) or specialized training techniques (Lee et al., 2025).

**Theoretical Work.** Theoretical understanding of length generalization is an active area of research, with several perspectives emerging. One line of work aims to characterize the class of functions on which Transformers exhibit length generalization. The RASP-L Conjecture (Zhou et al., 2024a) posits that Transformers exhibit good length generalization precisely on tasks solvable by short programs in RASP (a language which models Transformer computation (Weiss et al., 2021)); despite recent work Huang et al. (2025); Yang and Chiang (2024), this remains open. Some other works have studied simpler models, like linearized attention (Sabbaghi et al., 2024) or average pairwise attention (Ahuja and Mansouri, 2024), and show asymptotic length generalization for these classes. Huang et al. (2025) define the limit transformer and show length generalization asymptotically. Li et al. (2025) consider the “vanishing variance” phenomenon where attention output variance decreases with length under certain assumptions. Many other works focus on showing expressivity of transformers, and do not consider issues of learnability. Our work focuses on giving general conditions under which the model exhibits length generalization, and gives quantitative bounds for finite lengths.

The work of Wang et al. (2024b) prove that performing gradient descent on transformers successfully learns sparse token selection (i.e., the task of choosing a sparse set of  $k$  out of  $n$  tokens and taking their average); moreover it exhibits good length generalization, where the error scales as the square of the length increase. Although it relies on a specific training process, this result is very much in the same spirit as ours. Another work focusing on sparsity is the concurrent work of Golowich et al. (2025), who also propose a theoretical framework to study generalization via sparsity; they use an idea called predictive position coupling to achieve length generalization. This idea is orthogonal to ours, and it would be interesting to see if these can be combined to get even better performance.

Finally, formal language theory gives a different lens, investigating the classes of formal languages Transformers can recognize or generate (Strobl et al., 2024).

## 2 A Framework for Length Generalization

This section introduces a formal framework to analyze the conditions under which Transformer models achieve length generalization on sequence-to-sequence tasks.

Let  $\Sigma$  and  $\Gamma$  be finite input and output alphabets respectively. A *sequence-to-sequence* task is defined by a target function  $f : \Sigma^* \rightarrow \Gamma^*$ , where  $\Sigma^*$  and  $\Gamma^*$  denote the set of all possible finite sequences over the respective alphabets. The model, typically a Transformer, is trained on a dataset  $\mathcal{D}_{\text{train}}$  consisting of input-output pairs  $(\mathbf{x}, \mathbf{y})$  where  $\mathbf{x} \in \Sigma^*$ ,  $\mathbf{y} = f(\mathbf{x})$ , and the length of the input sequence  $|\mathbf{x}| \leq n$  for some maximum training length  $n$ .

Length generalization refers to the model’s ability to perform well on input sequences  $\mathbf{x}$  with lengths  $N > n$  drawn from a test distribution  $\mathcal{D}_{\text{test}}^N$ . Formally, let  $\mathcal{M}$  be a model trained on  $\mathcal{D}_{\text{train}}$ . Let  $\text{Err}(\mathcal{M}, \mathcal{D})$  denote the expected error (i.e.,  $1 - \text{accuracy}$ ) of model  $\mathcal{M}$  on distribution  $\mathcal{D}$ . We say that  $\mathcal{M}$  exhibits *length generalization* if  $\text{Err}(\mathcal{M}, \mathcal{D}_{\text{test}}^N)$  for  $N > n$  remains low—ideally close to  $\text{Err}(\mathcal{M}, \mathcal{D}_{\text{train}})$  for  $N \approx n$  and degrading gracefully as  $N$  increases—rather than exhibiting a sharp increase in error immediately beyond  $n$ . Length generalization contrasts with in-distribution generalization, which concerns performance on unseen examples  $(\mathbf{x}, \mathbf{y})$  where  $\mathbf{x} \sim \mathcal{D}_{\text{train}}$  and hence  $|\mathbf{x}| \leq n$ .

In this work, we focus on decoder-only Transformers. Let  $\mathcal{M} = (E, D, K, Q, V)$  be a decoder-only single-layer Transformer model with a single attention head and no MLP layer. Here  $E$  and  $D$  are the encoder and decoder matrices, and  $K, Q, V$  are the key, query, value matrices respectively.

## 2.1 Modeling Single-Token Outputs

We first consider the problem of computing a function  $f : \Sigma^* \rightarrow \Gamma$  mapping each input sequence  $\mathbf{x} = \langle x_1, \dots, x_n \rangle$  to a *single* output symbol  $f(\mathbf{x}) \in \Gamma$ . We assume the existence of a special end-of-input symbol  $\perp \notin \Sigma \cup \Gamma$ . The Transformer model  $\mathcal{M}$  is given the augmented sequence  $\mathbf{x} \circ \perp$ , and we use the representation  $z_\perp$  of the  $\perp$  token after the attention layer to generate the output  $\mathcal{M}(\mathbf{x}) = \arg \max_{j \in \Gamma} \langle z_\perp, \mathbf{d}_j \rangle$ , where  $\mathbf{d}_j$  is the decoder column corresponding to  $j \in \Gamma$ .

For  $n \in \mathbb{Z}_+$ , consider a distribution  $\mathcal{D}_n$  on sequences of length  $n$  from  $\Sigma$ . Let  $\mathcal{D}$  refer to this ensemble of distributions  $\mathcal{D}_n$ , one for each  $n \in \mathbb{Z}_+$ .

**Definition 2.1** (Goodness). *A model  $\mathcal{M}$  is  $(\varepsilon, \gamma)$ -good at length  $n$  with respect to distribution  $\mathcal{D}_n$  if*

$$\mathbb{P}_{\mathbf{x} \sim \mathcal{D}_n} [\exists j \in \Gamma : j \neq f(\mathbf{x}) : \langle z_\perp, \mathbf{d}_j \rangle \geq \langle z_\perp, \mathbf{d}_{f(\mathbf{x})} \rangle - \gamma] \leq \varepsilon,$$

where  $\mathbf{d}_j$  is the vector mapping to the output symbol  $j \in \Gamma$ . Here we call  $\gamma$  the margin at length  $n$ .

Observe that if the model is  $(\varepsilon, \gamma)$ -good for any value of  $\gamma \geq 0$ , then the probability of error is at most  $\varepsilon$ ; moreover, a large value of  $\gamma$  indicates that the model is correct *and* confident whp.

**Definition 2.2** (Sparse Functions). *A function  $f : \Sigma^* \rightarrow \Gamma$  is  $s$ -sparse if for each  $\mathbf{x} \in \Sigma^*$ , there exists some set  $A(\mathbf{x}) \subseteq \{1, \dots, |\mathbf{x}|\}$  of  $s$  positions such that for any subsequence  $\mathbf{x}'$  of  $\mathbf{x}$  containing the symbols at the positions in  $A(\mathbf{x})$ , we have  $f(\mathbf{x}') = f(\mathbf{x})$ . We call  $A(\mathbf{x})$  the anchor set for  $\mathbf{x}$ .*

For example, the minimum and maximum functions are both 1-sparse functions, whereas the successor function (which, given an unsorted sequence  $\mathbf{x}$ , and a number  $i$  in this sequence, outputs the next higher number in  $\mathbf{x}$ ) is 3-sparse. We focus on  $s$ -sparse functions for the rest of this section.

**Definition 2.3** (Perturbation). *For  $N > n$ , define the  $(N, n)$ -perturbation of  $\mathcal{D}_N$  as the distribution over sequences of expected length  $n + s$  obtained by first drawing a random sequence  $\mathbf{x}$  from  $\mathcal{D}_N$ , keeping the symbols in the anchor set  $A(\mathbf{x})$  and keeping each symbol in the  $N - s$  positions in  $[N] \setminus A(\mathbf{x})$  independently with probability  $\frac{n-s}{N-s} \geq \frac{n}{N}$ , where  $s = |A(\mathbf{x})|$ . The expected length of the resulting sequence is  $n + s$ .*

We could have defined perturbations to be random sequences of length *exactly*  $n + s$  obtained by retaining a uniformly random set of size  $n$  from the  $N - s$  positions; we focus on the i.i.d. case for simplicity of exposition. Note that in the typical case of  $s \ll n$ , the length of the subsequence obtained in the i.i.d. setting is  $(1 \pm \varepsilon)(n + s)$  with probability  $1 - \exp(-O(\varepsilon^2 n))$ .

**Definition 2.4** (Robustness). *A model  $\mathcal{M}$  is  $(N, n)$ -robust w.r.t.  $\mathcal{D}$  with parameters  $(\varepsilon, \gamma)$  if the model is  $(\varepsilon, \gamma)$ -good with respect to  $\mathcal{D}_n$ , and also with respect to the  $(N, n)$ -perturbation of  $\mathcal{D}_N$ .*

While our theoretical model considers the performance on sequences that have length  $\approx (1 \pm \varepsilon)(n + s)$  with high probability, our experiments are done on sequences of length  $n + s$ . This choice to consider i.i.d. sampling in our theoretical results is purely for analytical simplicity.

## 3 Length Generalization Bounds

We first consider the case of single-token outputs. Our main generalization bound here says that if the model is  $(N, n)$ -robust, then it is also good at length  $N$  (with suitably weaker parameters). Formally, let  $\|V\|$  denote the operator norm of the value matrix. Then we show:

**Theorem 3.1** (Single-Token Generalization). *For  $c > 1$ , let  $\mathcal{M} = (E, D, K, Q, V)$  be a one-layer attention-only Transformer; assume that the encoder matrix  $E$  and decoder matrix  $D$  have unit-length columns. Suppose  $\mathcal{M}$  is  $(N, n)$ -robust with parameters  $(\varepsilon, \gamma)$ , where  $\gamma > 2\|V\| \cdot (1 - 1/4c)$  for  $N \leq cn$ . Then  $\mathcal{M}$  is  $(O(\varepsilon \cdot N/n), 0)$ -good at length  $N$ .*

In particular, the probability of erring at length  $N$  degrades linearly in the sequence length. While the theorem does not depend on how the model is trained, or the length of sequences on which this training should be done, our experiments are performed when training on length up to  $n + s$ .

To prove Theorem 3.1, it will be convenient to have the following ‘‘anti-concentration’’ bound. (We use this only for the special case of independent random variables, but we prove it for a more general negative correlation property that captures sampling without replacement.)

**Theorem 3.2** (Anti-Concentration Bound). Suppose  $Z_1, \dots, Z_m$  are identical Bernoulli random variables with  $\mathbb{E}[Z_i] = q$  and satisfying the negative cylinder property that  $\Pr[\wedge_{i \in T} Z_i = 0] \leq \prod_{i \in T} \Pr[Z_i = 0]$  for all  $T \subseteq [m]$ . Let  $a_1, \dots, a_m$  be non-negative real numbers and suppose  $\sum_i a_i \geq 1$ . Define  $X = \sum_i a_i Z_i$  (hence  $\mathbb{E}[X] \geq q$ ). Then, we have  $\Pr[X \geq q/4] \geq q/2$ .

We can now return to the proof of our length generalization result for single-token outputs.

*Proof of Theorem 3.1.* Consider an input sequence  $\mathbf{x} = \langle x_1, \dots, x_N \rangle$  of length  $N$  on which the model makes a mistake. Recall that we feed the augmented sequence  $\mathbf{x} \circ \perp$  to the model, which returns  $\arg \max_{j \in \Gamma} \langle \mathbf{z}_\perp, \mathbf{d}_j \rangle$  as the answer. (Here  $\mathbf{z}_\perp$  is the embedding of the end-of-input token after passing through the model, and  $\mathbf{d}_j$  is the column of the decoder matrix corresponding to output symbol  $j \in \Gamma$ .) Let  $j^* = f(\mathbf{x}) \in \Gamma$  be the correct answer on this sequence; since the model makes a mistake on  $\mathbf{x}$ , it outputs some other symbol  $j^\dagger \in \Gamma, j^\dagger \neq j^*$ .

The attention structure of our model ensures that the representation of the  $\perp$  token must be

$$\mathbf{z}_\perp = \frac{\sum_{i=1}^N \exp(\langle K \mathbf{e}_{x_i}, Q \mathbf{e}_\perp \rangle) \cdot V \mathbf{e}_{x_i}}{\sum_{i=1}^N \exp(\langle K \mathbf{e}_{x_i}, Q \mathbf{e}_\perp \rangle)} = \frac{\sum_{i=1}^N w_i \mathbf{v}_i}{\sum_{i=1}^N w_i},$$

where  $\mathbf{e}_{x_i}$  is the encoding of the symbol  $x_i$  and  $\mathbf{e}_\perp$  that of the end-of-input symbol  $\perp$ , and we use  $\mathbf{v}_i = V \mathbf{e}_{x_i}$  and  $w_i = \exp(\langle K \mathbf{e}_{x_i}, Q \mathbf{e}_\perp \rangle) \geq 0$  to reduce notation. Define  $\alpha_i := \langle \mathbf{v}_i, \mathbf{d}_{j^*} - \mathbf{d}_{j^\dagger} \rangle$ . Since each of the  $\mathbf{e}_i, \mathbf{d}_j$  vectors has unit length, we have the following upper bound on  $\alpha_i$ :

$$\alpha_i = \langle \mathbf{v}_i, \mathbf{d}_{j^*} - \mathbf{d}_{j^\dagger} \rangle = \langle V \mathbf{e}_{x_i}, \mathbf{d}_{j^*} - \mathbf{d}_{j^\dagger} \rangle \leq 2\|\mathbf{V}\|. \quad (1)$$

Now, since the model errs on  $\mathbf{x}$  and outputs  $j^\dagger$  instead of  $j^* = f(\mathbf{x})$ , we have

$$0 \geq \langle \mathbf{z}_\perp, \mathbf{d}_{j^*} - \mathbf{d}_{j^\dagger} \rangle = \frac{\sum_{i \in A(\mathbf{x})} w_i \alpha_i + \sum_{i \in [N] \setminus A(\mathbf{x})} w_i \alpha_i}{\sum_{i \in [N]} w_i}. \quad (2)$$

Suppose the model errs at length  $N$  with probability  $\delta$ . We want to show the following claim: *conditioned on making an error (say on sequence  $\mathbf{x}$ ), the probability that the margin is less than  $\gamma$  on the  $(N, n)$ -perturbation of  $\mathcal{D}$  is at least  $\delta p/2$ , where  $p = \frac{n}{N-s} \geq \frac{n}{N} \geq \frac{1}{c}$ .* Indeed, by assumption, we know this probability of small margin must be smaller than  $\varepsilon$ , so  $\delta \cdot n/(2N) \leq \delta p/2 \leq \varepsilon$ , so  $\delta \leq \varepsilon \cdot (2N/n)$ , proving the theorem.

Now we prove the claim. Define  $Q' := \{i \in [N] \setminus A(\mathbf{x}) \mid \alpha_i < 0\}$  to be the indices of the negative terms in the numerator of (2) but outside the anchor set and let  $P' := [N] \setminus Q'$ .  $P'$  thus contains either the indices of the non-negative terms in the numerator of (2) or indices that are in the anchor set (hence retained in the perturbation with probability 1). We focus on this numerator and regroup terms to get:

$$\sum_{i \in P'} w_i \alpha_i \leq \sum_{i \in Q'} w_i |\alpha_i|. \quad (3)$$

Recall the definition of the  $(N, n)$ -perturbation of the sequence: it retains all the  $s$  tokens that “force” the correct output  $j^*$  (i.e., samples them with probability 1) and samples each other token independently with probability  $p$ . Let  $Y_i$  be the indicator r.v. for the token  $\sigma_i$  with  $i \in [N]$  being sampled, and let  $\tilde{\mathbf{x}}$  denote the (random) shorter subsequence obtained from  $\mathbf{x}$  by restricting to the sampled indices (and  $\tilde{\mathbf{z}}$  being the r.v. denoting the embedding of the  $\perp$  token on this input). Consider the outcomes of  $\{Y_i\}$  for  $i \in P'$ , and let us condition on their values being  $Y_i = y_i$ ; this gives us

$$\langle \tilde{\mathbf{z}}_\perp, \mathbf{d}_{j^*} - \mathbf{d}_{j^\dagger} \rangle = \frac{\sum_{i \in P'} w_i \alpha_i y_i - \sum_{i \in Q'} w_i |\alpha_i| Y_i}{\sum_{i \in P'} w_i y_i + \sum_{i \in Q'} w_i Y_i}. \quad (4)$$

Now, we consider the sum  $S := \sum_{i \in P'} w_i \alpha_i y_i$ . If  $S \leq 0$ , then we are done since it means the model made an error at length  $n$  and hence the small margin claim holds vacuously. Therefore, we focus on  $S > 0$ . Now define  $a_i := w_i |\alpha_i| / S$  for  $i \in Q'$ ; observe that  $\sum_{i \in Q'} a_i \geq 1$  because of (3). Hence the  $a_i$  values and the associated i.i.d. random variables  $Y_i$  satisfy the conditions of Theorem 3.2, which implies that  $\Pr[\sum_{i \in Q'} w_i |\alpha_i| Y_i \geq S p/4] \geq p/2$ . Moreover,  $\sum_{i \in Q'} w_i Y_i \geq 0$  always holds for any indicator r.v.’s  $Y_i$  in  $Q'$ . Substituting these back into (4), we get that conditioned on  $\mathcal{M}$  making a mistake on  $\mathbf{x}$ , and for any conditioning  $Y_i = y_i$  for the r.v.’s in  $P'$ , the following upper bound on the margin holds w.p. at least  $p/2$ :

$$\langle \tilde{\mathbf{z}}_\perp, \mathbf{d}_{j^*} - \mathbf{d}_{j^\dagger} \rangle \leq \frac{(1 - p/4) \cdot \sum_{i \in P'} w_i \alpha_i y_i}{\sum_{i \in P'} w_i y_i} \stackrel{(1)}{\leq} 2\|\mathbf{V}\| \cdot \left(1 - \frac{p}{4}\right) \leq 2\|\mathbf{V}\| \cdot \left(1 - \frac{1}{4c}\right). \quad \square$$

### 227 3.1 Extension to Multi-Token Outputs

228 Our theoretical framework also extends naturally to capture the more realistic scenario where the  
 229 output is a sequence of tokens as opposed to a single token. Note that in this case one can view  
 230 the problem of predicting each output token as an individual single-token output prediction problem  
 231 with a corresponding auxiliary task. Hence, in the multi-token output setting we have a set of  
 232 auxiliary tasks related to the main task, one per output position. Based on this we provide the  
 233 following guarantee. We defer the full details to the Appendix.

234 **Theorem 3.3** (Multi-Token Generalization). *For  $c > 1$ , let  $\mathcal{M} = (E, D, K, Q, V)$  be a one-layer*  
 235 *attention-only Transformer; assume that the encoder matrix  $E$  and decoder matrix  $D$  have unit-*  
 236 *length columns. Suppose  $\mathcal{M}$  is  $(N, n)$ -multi-token-robust with parameters  $(\varepsilon, \gamma)$ , where  $\gamma > 2\|V\| \cdot$   
 237  $(1 - 1/4c)$  for  $N \leq cn$ . Then  $\mathcal{M}$  is  $(O(\varepsilon \cdot N/n), 0)$ -good at length  $N$ .*

### 238 3.2 A Training Recipe for Length Generalization

239 Our framework suggests a natural training recipe for inducing length generalization for sparse tasks.

- 240 1. Define *auxiliary tasks*, which are the “next step” operations that are repeatedly performed  
 241 by the main task. The auxiliary tasks are to be performed on  $(N, n)$ -perturbations, i.e., by  
 242 generating length  $N$  sequences and then subsampling the irrelevant tokens down to length  
 243  $n$ .
- 244 2. Train the model simultaneously on the main task and the auxiliary tasks. In particular,  
 245 one can use the standard multi-task training where, during each gradient step, a batch of  
 246 data from either the main task or an auxiliary task is used (in a round-robin manner) for  
 247 backpropagation.

## 248 4 Experiments

249 In this section we present empirical results evaluating the training recipe for length generalization.  
 250 The goal is to assess its effectiveness in improving length generalization on challenging and some  
 251 well-known synthetic tasks and to validate the underlying theoretical assumptions in our framework.  
 252 We begin by describing the synthetic tasks that we consider, and the corresponding auxiliary tasks.  
 253 In each case we will provide an example illustration of the main task and the corresponding auxiliary  
 254 task. When presenting the auxiliary task we will use a red colored token to represent the current  
 255 token for which the next token output needs to be found. We will use blue colored tokens to highlight  
 256 the corresponding relevant tokens for the auxiliary task.

### 257 4.1 Synthetic Tasks

258 **Sorting:** We consider sorting sequences of a particular length  $m$  where each element is drawn  
 259 uniformly at random from a vocabulary  $V = \{1, \dots, 100\}$ . Given an input sequence  $x =$   
 260  $\langle x_1, \dots, x_m, \perp \rangle$  the main task corresponds to outputting the sorted sequence. The natural auxil-  
 261 iary task is to produce the successor of a given element in the output sequence. Figure 1 shows  
 262 an example of the sorting task and a corresponding auxiliary task. For the sorting task we train on  
 263 sequences of length up to 20 and measure length generalization for higher length sequences.

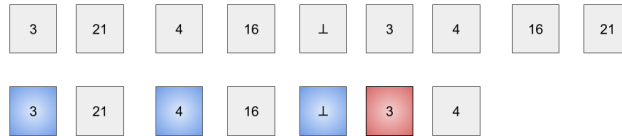

Figure 1: An example of the sorting main task and an auxiliary task.

264 **Reversal:** We consider the task of reversing a given sequence where each element is drawn uni-  
 265 formly at random from a vocabulary  $V = \{1, \dots, 100\}$ . Note that for the reversal task, a model  
 266 has to crucially keep track of the position in the input of the current token that is being output. We  
 267 consider the following representation of the task that makes this explicit and lets us design auxiliary

tasks that depend on a small number of relevant token. We explicitly append *pos* and *val* tokens to keep track of the position information. As with sorting we train the reversal task on sequences of length up to 20. See Figure 2 for an example.

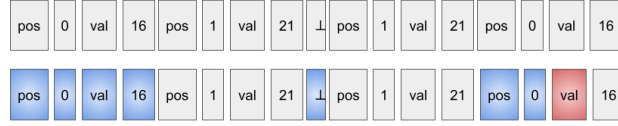

Figure 2: An example of the reversal main task and an auxiliary task: to output a value, we pay attention to the current position (which is 0), and to the corresponding pos 0 and val 16 in the input.

**Increment:** The increment task consists of adding 1 to a sequence of digits chosen from 0 to 9. As is standard for length generalization on arithmetic tasks, we consider producing the incremented number in reverse format (lowest significant digit first). Furthermore, we again include *pos* token along with the *sum* and *carry* tokens that let us define sparse auxiliary tasks. See Figure 3 for an example. We train the increment task for sequences of length up to 20.

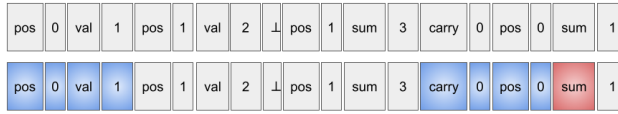

Figure 3: An example of the increment main task and an auxiliary task. Since we have a carry of 0 at position 0, and a value of 1 at this position in the input, the output is 1.

**SLiM (Small Language Modeling) Task:** This synthetic task is inspired by language modeling. In a typical language modeling setting, each output token depends on a small number of prior tokens. However, these tokens may not always be the most recent ones, but may appear at arbitrary prior positions in the input sequence. Furthermore, given the correct tokens to attend to, the rule for producing the next output token is more involved than a simple copy operation. We consider an idealized scenario to capture this behavior. We consider the vocabulary of  $V = \{1, \dots, 100\}$  that is randomly partitioned into two classes *A* and *B*. The sequence is seeded with a set of four tokens, two of which are chosen randomly from class *A* and the other two randomly from class *B*. Given a current output token from class *A* (class *B*, resp.), the next token is produced by finding the previous class *A* token (class *B*, resp.) in the sequence, and computing the sum of the two values (modulo 100). See Figure 4 for an example. We train the SLiM task on sequences of length up to 20.

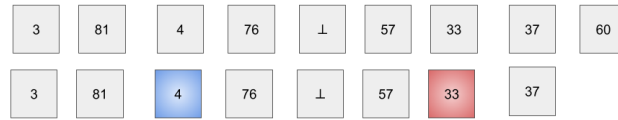

Figure 4: An example of the SLiM main task and an auxiliary task. In this example numbers from 1 to 50 belong to class *A* and the numbers from 51 to 100 belong to class *B*. The token 33 pays attention to the previous token of the same class, i.e., to 4, and sums to output 37.

## 4.2 Training Details

A standard decoder-only Transformer architecture is used (unless otherwise specified), with details on the number of layers, heads, embedding dimensions, and activation functions provided in the Appendix. We trained each model without positional embeddings. The proposed multi-task training method used the same backbone architecture with an additional output head for the auxiliary tasks. For all the tasks, we train on sequences of length up to 20. In order to generate the training data for the main task, we sample a length  $n$  from  $[4, 20]$  at random and chose a random sequence of length  $n$ . (For the increment task we consider a slightly non-uniform sampling where 20% of the training

data consists of sequences that end with a 9.) Crucially, the training data for the auxiliary tasks is generated from  $(N, n)$ -perturbations: i.e., first drawing an input sequence of a larger length and then random subsampling the irrelevant tokens down to length  $n$ . (As mentioned above, we subsample these tokens without replacement to get a fixed length, instead of sampling each one independently.)

Models were trained using the AdamW optimizer with a cosine learning rate schedule and a batch size of 1024 (details in Appendix). The baseline model was trained solely on the primary task. The proposed method was trained using the multi-task training procedure detailed above. The primary metric was Exact Match (EM) accuracy: the percentage of test sequences for which the model’s generated output exactly matched the ground truth.

### 4.3 Results

Figure 5 summarizes the results across the synthetic tasks that we consider. The baseline models, while achieving high accuracy within the training length distribution (length at most  $n$ ), exhibit the typical sharp drop in performance for lengths more than  $n$ . In contrast, the models trained with the auxiliary tasks maintain high accuracy far beyond  $n$ . For instance, on the sorting task, training on lengths up to 20, the baseline model’s accuracy drops below 1% for length 100, whereas the proposed method achieves over 90% accuracy. Similarly strong gains are observed for the increment, reversal and the SLiM task as well.

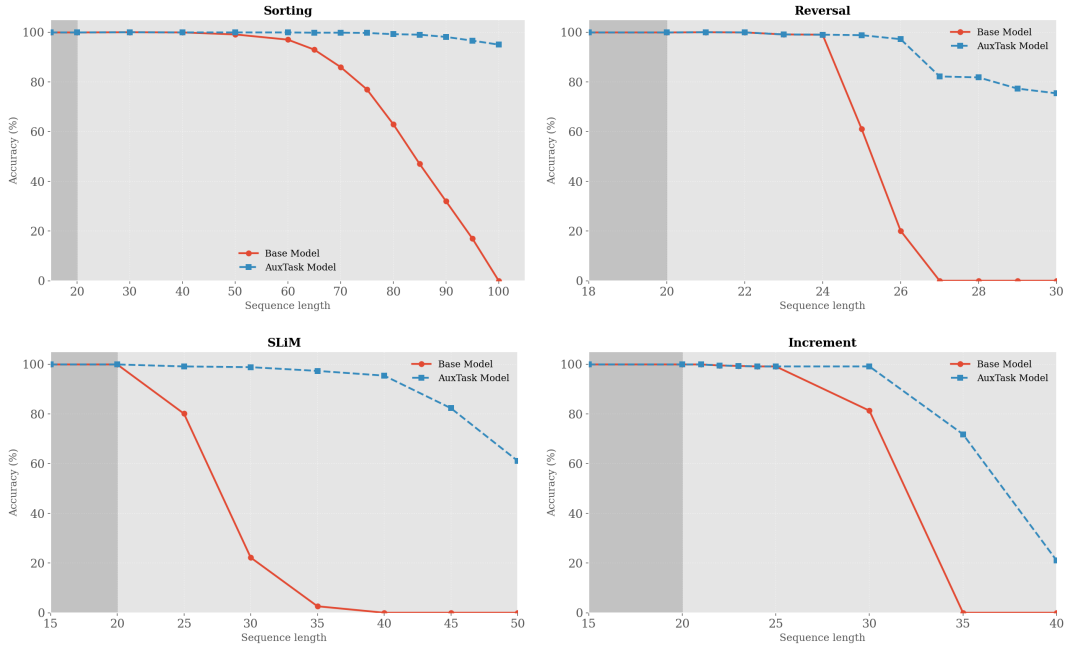

Figure 5: A comparison of the length generalization performance of the baseline training method vs. the proposed auxiliary task based method on various synthetic tasks. The  $x$ -axis represents the sequence length and the  $y$ -axis is the exact match (EM) accuracy. The shaded region represents the sequence lengths used during training and the non-shaded region represents the sequence lengths that the model does not see during training time.

311

We make a few observations about the results. Note that the performance on sorting is good up to length 60 even for the baseline model. This is consistent with similar observations made in prior works (Zhou et al., 2024a). The performance of the baseline model starts to drop sharply beyond 60 whereas the model trained with auxiliary tasks maintains high accuracy (more than 95%) even up to length 100. For tasks that involved carefully maintaining position information and indexing into a specific position in the input the performance of the baseline model drops sharply whereas the auxiliary task trained model has much greater robustness. Finally, the SLiM task, which involves learning simultaneously a rule for attending to specific tokens and a rule for using the attended



tokens is significantly harder for the baseline model and its performance drops sharply beyond the training length. We again observe that by incorporating the auxiliary tasks in the training procedure the model is robust for up to two times the training length.

These results strongly support the hypothesis that explicitly training on the auxiliary tasks suggested by our framework, and using perturbed distributions, effectively guides the model to learn the internal mechanisms necessary for length generalization.

#### 4.4 Scaling Experiments

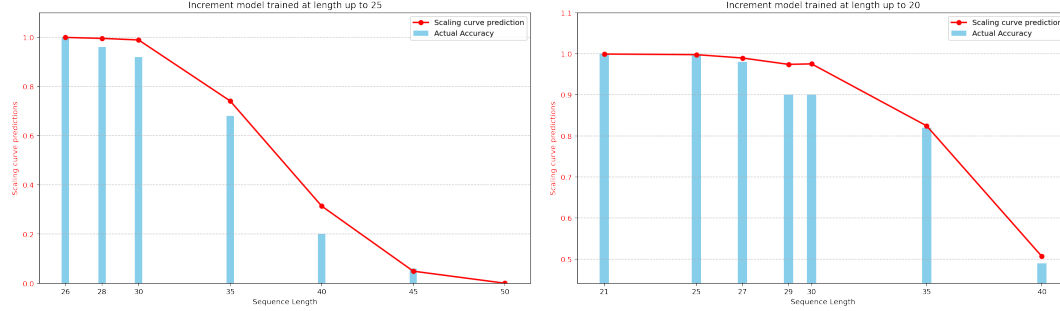

Figure 6: Scaling plots for the increment task. The left figure shows the observed accuracy (blue bars) at various lengths and the accuracy as predicted by (5) for a model trained for length up to 20. The right figure shows the same plot for a model trained for length up to 25. Both the models are trained via the auxiliary task framework.

In this section we further aim to validate the practical relevance of our framework. Note that our key conceptual contribution is to establish a connection between the performance of a model on auxiliary tasks with its ability to length generalize. Our main claim (Theorem 3.1) needs one to achieve a margin of  $2\|V\|(1 - \frac{1}{4c})$  over the set of auxiliary tasks. However, this bound may be too pessimistic in real settings. In particular, analysis of a typical average case scenario reveals the following *rule-of-thumb* for length generalization (see Appendix for details):

$$\Pr [\text{error at length } N = c \cdot N] \sim \Pr [\text{aux. task margin} \leq \alpha \frac{(1 - 1/c)}{n}], \quad (5)$$

where  $\alpha$  is a problem dependent constant.

We then perform a series of scaling experiments where we train models for our proposed synthetic tasks at various training lengths  $n$  and compare how well does our proposed predicted length generalization performance from (5) match the empirically observed accuracy. Figure 6 shows one instance of this for the increment task trained at two different lengths (see appendix for other scaling experiments). We see that (5) is consistently a good predictor of the length generalization performance across various values of  $N$ . These experiments help validate the connection between the theoretical conditions assumed in our framework and achievable performance in practical settings.

## 5 Conclusion

Our work aims to bridge the gap between theoretical understanding and practical improvements in length generalization. By deriving auxiliary tasks directly from a novel framework, we offer a principled alternative to current mostly heuristic approaches. Limitations of our work include the need to further validate the assumptions and extend the framework to more complex tasks, particularly in natural language processing where defining clear algorithmic structures and relevant auxiliary tasks can be challenging. The specific theoretical models analyzed (e.g., single-layer Transformers) are simplifications, and extending our results to deeper, more complex architectures is an important future step. Additional interesting directions include relaxing the theoretical assumptions and automatically discovering relevant auxiliary tasks.

## References

- Ahuja, K. and Mansouri, A. (2024). On provable length and compositional generalization. *arXiv:2402.04875*.
- Anil, C., Wu, Y., Andreassen, A., Lewkowycz, A., Misra, V., Ramasesh, V., Slone, A., Gur-Ari, G., Dyer, E., and Neyshabur, B. (2022). Exploring length generalization in large language models. In *NeurIPS*, pages 38546–38556.
- Cho, H., Cha, J., Awasthi, P., Bhojanapalli, S., Gupta, A., and Yun, C. (2024). Position coupling: Leveraging task structure for improved length generalization of transformers. In *First Workshop on Long-Context Foundation Models@ ICML*.
- Devlin, J., Chang, M.-W., Lee, K., and Toutanova, K. (2019). BERT: Pre-training of deep bidirectional transformers for language understanding. In *NAACL-HLT (1)*, pages 4171–4186.
- Duan, S., Shi, Y., and Xu, W. (2023). From interpolation to extrapolation: Complete length generalization for arithmetic transformers. *arXiv:2310.11984*.
- Fan, Y., Du, Y., Ramchandran, K., and Lee, K. (2024). Looped transformers for length generalization. *arXiv:2409.15647*.
- Golowich, N., Jelassi, S., Brandfonbrener, D., Kakade, S. M., and Malach, E. (2025). The role of sparsity for length generalization in transformers. In *ICML*.
- Huang, X., Yang, A., Bhattamishra, S., Sarrof, Y., Krebs, A., Zhou, H., Nakkiran, P., and Hahn, M. (2025). A formal framework for understanding length generalization in transformers. In *ICLR*.
- Jelassi, S., d’Ascoli, S., Domingo-Enrich, C., Wu, Y., Li, Y., and Charton, F. (2023). Length generalization in arithmetic transformers. *arXiv:2306.15400*.
- Kazemnejad, A., Padhi, I., Natesan Ramamurthy, K., Das, P., and Reddy, S. (2023). The impact of positional encoding on length generalization in transformers. In *NeurIPS*.
- Lee, N., Cai, Z., Schwarzschild, A., Lee, K., and Papailiopoulos, D. (2025). Self-improving transformers overcome easy-to-hard and length generalization challenges. In *ICML*.
- Lee, N., Sreenivasan, K., Lee, J. D., Lee, K., and Papailiopoulos, D. (2024). Teaching arithmetic to small transformers. In *ICLR 2024*.
- Li, R., Boduljak, G., and Zhou, J. (2025). On vanishing variance in transformer length generalization. *arXiv:2504.02827*.
- Li, S., You, C., Guruganesh, G., Ainslie, J., Ontanon, S., Zaheer, M., Sanghai, S., Yang, Y., Kumar, S., and Bhojanapalli, S. (2024). Functional interpolation for relative positions improves long context transformers. In *ICLR*.
- McLeish, S., Bansal, A., Stein, A., Jain, N., Kirchenbauer, J., Bartoldson, B. R., Kailkhura, B., Bhatele, A., Geiping, J., Schwarzschild, A., and Goldstein, T. (2024). Transformers can do arithmetic with the right embeddings. In *NeurIPS*.
- Merrill, W. and Sabharwal, A. (2024). The expressive power of transformers with chain of thought. In *ICLR*.
- Nangia, N. and Bowman, S. R. (2018). ListOps: a diagnostic dataset for latent tree learning. In *NAACL 2018*.
- Nye, M., Andreassen, A. J., Gur-Ari, G., Michalewski, H., Austin, J., Bieber, D., Dohan, D., Lewkowycz, A., Bosma, M., Luan, D., Sutton, C., and Odena, A. (2021). Show your work: Scratchpads for intermediate computation with language models. *arXiv:2112.00114*.
- Press, O., Smith, N. A., and Lewis, M. (2022). Train short, test long: Attention with linear biases enables input length extrapolation. In *ICLR*.
- Sabbaghi, M., Pappas, G., Hassani, H., and Goel, S. (2024). Explicitly encoding structural symmetry is key to length generalization in arithmetic tasks. *arXiv:2406.01895*.
- Saxton, D., Grefenstette, E., Hill, F., and Kohli, P. (2019). Analysing mathematical reasoning abilities of neural models. In *ICLR*.
- Strobl, L., Merrill, W., Weiss, G., Chiang, D., and Angluin, D. (2024). What formal languages can transformers express? A survey. *TACL*, 12:543–561.

401 Tay, Y., Dehghani, M., Abnar, S., Shen, Y., Bahri, D., Pham, P., Rao, J., Yang, L., Ruder, S., and  
402 Metzler, D. (2021). Long range arena: A benchmark for efficient transformers. In *ICLR*.

403 Vaswani, A., Shazeer, N., Parmar, N., Uszkoreit, J., Jones, L., Gomez, A. N., Kaiser, Ł., and Polosukhin, I. (2017). Attention is all you need. In *NIPS*, pages 5998–6008.

404 Wang, J., Ji, T., Wu, Y., Yan, H., Gui, T., Zhang, Q., Huang, X., and Wang, X. (2024a). Length  
405 generalization of causal transformers without position encoding. In *ACL (Findings)*.

406 Wang, Z., Wei, S., Hsu, D., and Lee, J. D. (2024b). Transformers provably learn sparse token  
407 selection while fully-connected nets cannot. In *ICML*.

408 Weiss, G., Goldberg, Y., and Yahav, E. (2021). Thinking like transformers. In *ICML*.

409 Yang, A. and Chiang, D. (2024). Counting like transformers: Compiling temporal counting logic  
410 into softmax transformers. In *COLM*.

411 Zhao, L., Feng, X., Feng, X., Zhong, W., Xu, D., Yang, Q., Liu, H., Qin, B., and Liu, T. (2024).  
412 Length extrapolation of transformers: A survey from the perspective of positional encoding. In  
413 *EMNLP (Findings)*.

414 Zhou, H., Bradley, A., Littwin, E., Razin, N., Saremi, O., Susskind, J., Bengio, S., and Nakkiran, P.  
415 (2024a). What algorithms can transformers learn? A study in length generalization. In *ICLR*.

416 Zhou, Y., Alon, U., Chen, X., Wang, X., Agarwal, R., and Zhou, D. (2024b). Transformers can  
417 achieve length generalization but not robustly. In *Workshop on Understanding Foundation Mod-*  
418 *els@ ICLR*.

## NeurIPS Paper Checklist

### 1. Claims

Question: Do the main claims made in the abstract and introduction accurately reflect the paper's contributions and scope?

Answer: [\[Yes\]](#)

Justification: See abstract and the introduction.

Guidelines:

- The answer NA means that the abstract and introduction do not include the claims made in the paper.
- The abstract and/or introduction should clearly state the claims made, including the contributions made in the paper and important assumptions and limitations. A No or NA answer to this question will not be perceived well by the reviewers.
- The claims made should match theoretical and experimental results, and reflect how much the results can be expected to generalize to other settings.
- It is fine to include aspirational goals as motivation as long as it is clear that these goals are not attained by the paper.

### 2. Limitations

Question: Does the paper discuss the limitations of the work performed by the authors?

Answer: [\[Yes\]](#)

Justification: See the conclusion section.

Guidelines:

- The answer NA means that the paper has no limitation while the answer No means that the paper has limitations, but those are not discussed in the paper.
- The authors are encouraged to create a separate "Limitations" section in their paper.
- The paper should point out any strong assumptions and how robust the results are to violations of these assumptions (e.g., independence assumptions, noiseless settings, model well-specification, asymptotic approximations only holding locally). The authors should reflect on how these assumptions might be violated in practice and what the implications would be.
- The authors should reflect on the scope of the claims made, e.g., if the approach was only tested on a few datasets or with a few runs. In general, empirical results often depend on implicit assumptions, which should be articulated.
- The authors should reflect on the factors that influence the performance of the approach. For example, a facial recognition algorithm may perform poorly when image resolution is low or images are taken in low lighting. Or a speech-to-text system might not be used reliably to provide closed captions for online lectures because it fails to handle technical jargon.
- The authors should discuss the computational efficiency of the proposed algorithms and how they scale with dataset size.
- If applicable, the authors should discuss possible limitations of their approach to address problems of privacy and fairness.
- While the authors might fear that complete honesty about limitations might be used by reviewers as grounds for rejection, a worse outcome might be that reviewers discover limitations that aren't acknowledged in the paper. The authors should use their best judgment and recognize that individual actions in favor of transparency play an important role in developing norms that preserve the integrity of the community. Reviewers will be specifically instructed to not penalize honesty concerning limitations.

### 3. Theory assumptions and proofs

Question: For each theoretical result, does the paper provide the full set of assumptions and a complete (and correct) proof?

Answer: [\[Yes\]](#)

Justification: See section 3.

Guidelines:

- The answer NA means that the paper does not include theoretical results.
- All the theorems, formulas, and proofs in the paper should be numbered and cross-referenced.
- All assumptions should be clearly stated or referenced in the statement of any theorems.
- The proofs can either appear in the main paper or the supplemental material, but if they appear in the supplemental material, the authors are encouraged to provide a short proof sketch to provide intuition.
- Inversely, any informal proof provided in the core of the paper should be complemented by formal proofs provided in appendix or supplemental material.
- Theorems and Lemmas that the proof relies upon should be properly referenced.

#### 4. Experimental result reproducibility

Question: Does the paper fully disclose all the information needed to reproduce the main experimental results of the paper to the extent that it affects the main claims and/or conclusions of the paper (regardless of whether the code and data are provided or not)?

Answer: [\[Yes\]](#)

Justification: See Section 4 and the appendix.

Guidelines:

- The answer NA means that the paper does not include experiments.
- If the paper includes experiments, a No answer to this question will not be perceived well by the reviewers: Making the paper reproducible is important, regardless of whether the code and data are provided or not.
- If the contribution is a dataset and/or model, the authors should describe the steps taken to make their results reproducible or verifiable.
- Depending on the contribution, reproducibility can be accomplished in various ways. For example, if the contribution is a novel architecture, describing the architecture fully might suffice, or if the contribution is a specific model and empirical evaluation, it may be necessary to either make it possible for others to replicate the model with the same dataset, or provide access to the model. In general, releasing code and data is often one good way to accomplish this, but reproducibility can also be provided via detailed instructions for how to replicate the results, access to a hosted model (e.g., in the case of a large language model), releasing of a model checkpoint, or other means that are appropriate to the research performed.
- While NeurIPS does not require releasing code, the conference does require all submissions to provide some reasonable avenue for reproducibility, which may depend on the nature of the contribution. For example
  - (a) If the contribution is primarily a new algorithm, the paper should make it clear how to reproduce that algorithm.
  - (b) If the contribution is primarily a new model architecture, the paper should describe the architecture clearly and fully.
  - (c) If the contribution is a new model (e.g., a large language model), then there should either be a way to access this model for reproducing the results or a way to reproduce the model (e.g., with an open-source dataset or instructions for how to construct the dataset).
  - (d) We recognize that reproducibility may be tricky in some cases, in which case authors are welcome to describe the particular way they provide for reproducibility. In the case of closed-source models, it may be that access to the model is limited in some way (e.g., to registered users), but it should be possible for other researchers to have some path to reproducing or verifying the results.

#### 5. Open access to data and code

Question: Does the paper provide open access to the data and code, with sufficient instructions to faithfully reproduce the main experimental results, as described in supplemental material?

Answer: [No]

Justification: The code needs to go through an internal approval process for release. We will submit it post paper acceptance.

Guidelines:

- The answer NA means that paper does not include experiments requiring code.
- Please see the NeurIPS code and data submission guidelines (<https://nips.cc/public/guides/CodeSubmissionPolicy>) for more details.
- While we encourage the release of code and data, we understand that this might not be possible, so “No” is an acceptable answer. Papers cannot be rejected simply for not including code, unless this is central to the contribution (e.g., for a new open-source benchmark).
- The instructions should contain the exact command and environment needed to run to reproduce the results. See the NeurIPS code and data submission guidelines (<https://nips.cc/public/guides/CodeSubmissionPolicy>) for more details.
- The authors should provide instructions on data access and preparation, including how to access the raw data, preprocessed data, intermediate data, and generated data, etc.
- The authors should provide scripts to reproduce all experimental results for the new proposed method and baselines. If only a subset of experiments are reproducible, they should state which ones are omitted from the script and why.
- At submission time, to preserve anonymity, the authors should release anonymized versions (if applicable).
- Providing as much information as possible in supplemental material (appended to the paper) is recommended, but including URLs to data and code is permitted.

## 6. Experimental setting/details

Question: Does the paper specify all the training and test details (e.g., data splits, hyperparameters, how they were chosen, type of optimizer, etc.) necessary to understand the results?

Answer: [Yes]

Justification: See the appendix.

Guidelines:

- The answer NA means that the paper does not include experiments.
- The experimental setting should be presented in the core of the paper to a level of detail that is necessary to appreciate the results and make sense of them.
- The full details can be provided either with the code, in appendix, or as supplemental material.

## 7. Experiment statistical significance

Question: Does the paper report error bars suitably and correctly defined or other appropriate information about the statistical significance of the experiments?

Answer: [Yes]

Justification: See the appendix.

Guidelines:

- The answer NA means that the paper does not include experiments.
- The authors should answer “Yes” if the results are accompanied by error bars, confidence intervals, or statistical significance tests, at least for the experiments that support the main claims of the paper.
- The factors of variability that the error bars are capturing should be clearly stated (for example, train/test split, initialization, random drawing of some parameter, or overall run with given experimental conditions).
- The method for calculating the error bars should be explained (closed form formula, call to a library function, bootstrap, etc.)
- The assumptions made should be given (e.g., Normally distributed errors).

- It should be clear whether the error bar is the standard deviation or the standard error of the mean.
- It is OK to report 1-sigma error bars, but one should state it. The authors should preferably report a 2-sigma error bar than state that they have a 96% CI, if the hypothesis of Normality of errors is not verified.
- For asymmetric distributions, the authors should be careful not to show in tables or figures symmetric error bars that would yield results that are out of range (e.g. negative error rates).
- If error bars are reported in tables or plots, The authors should explain in the text how they were calculated and reference the corresponding figures or tables in the text.

## 8. Experiments compute resources

Question: For each experiment, does the paper provide sufficient information on the computer resources (type of compute workers, memory, time of execution) needed to reproduce the experiments?

Answer: [Yes]

Justification: See the appendix.

Guidelines:

- The answer NA means that the paper does not include experiments.
- The paper should indicate the type of compute workers CPU or GPU, internal cluster, or cloud provider, including relevant memory and storage.
- The paper should provide the amount of compute required for each of the individual experimental runs as well as estimate the total compute.
- The paper should disclose whether the full research project required more compute than the experiments reported in the paper (e.g., preliminary or failed experiments that didn't make it into the paper).

## 9. Code of ethics

Question: Does the research conducted in the paper conform, in every respect, with the NeurIPS Code of Ethics <https://neurips.cc/public/EthicsGuidelines>?

Answer: [Yes]

Justification: We have reviewed the code of ethics and we follow it.

Guidelines:

- The answer NA means that the authors have not reviewed the NeurIPS Code of Ethics.
- If the authors answer No, they should explain the special circumstances that require a deviation from the Code of Ethics.
- The authors should make sure to preserve anonymity (e.g., if there is a special consideration due to laws or regulations in their jurisdiction).

## 10. Broader impacts

Question: Does the paper discuss both potential positive societal impacts and negative societal impacts of the work performed?

Answer: [NA]

Justification: There are no immediate societal impacts of the work.

Guidelines:

- The answer NA means that there is no societal impact of the work performed.
- If the authors answer NA or No, they should explain why their work has no societal impact or why the paper does not address societal impact.
- Examples of negative societal impacts include potential malicious or unintended uses (e.g., disinformation, generating fake profiles, surveillance), fairness considerations (e.g., deployment of technologies that could make decisions that unfairly impact specific groups), privacy considerations, and security considerations.

- The conference expects that many papers will be foundational research and not tied to particular applications, let alone deployments. However, if there is a direct path to any negative applications, the authors should point it out. For example, it is legitimate to point out that an improvement in the quality of generative models could be used to generate deepfakes for disinformation. On the other hand, it is not needed to point out that a generic algorithm for optimizing neural networks could enable people to train models that generate Deepfakes faster.
- The authors should consider possible harms that could arise when the technology is being used as intended and functioning correctly, harms that could arise when the technology is being used as intended but gives incorrect results, and harms following from (intentional or unintentional) misuse of the technology.
- If there are negative societal impacts, the authors could also discuss possible mitigation strategies (e.g., gated release of models, providing defenses in addition to attacks, mechanisms for monitoring misuse, mechanisms to monitor how a system learns from feedback over time, improving the efficiency and accessibility of ML).

## 11. Safeguards

Question: Does the paper describe safeguards that have been put in place for responsible release of data or models that have a high risk for misuse (e.g., pretrained language models, image generators, or scraped datasets)?

Answer: [NA]

Justification: We don't deal with any sensitive or large scale data that has potential of misuse.

Guidelines:

- The answer NA means that the paper poses no such risks.
- Released models that have a high risk for misuse or dual-use should be released with necessary safeguards to allow for controlled use of the model, for example by requiring that users adhere to usage guidelines or restrictions to access the model or implementing safety filters.
- Datasets that have been scraped from the Internet could pose safety risks. The authors should describe how they avoided releasing unsafe images.
- We recognize that providing effective safeguards is challenging, and many papers do not require this, but we encourage authors to take this into account and make a best faith effort.

## 12. Licenses for existing assets

Question: Are the creators or original owners of assets (e.g., code, data, models), used in the paper, properly credited and are the license and terms of use explicitly mentioned and properly respected?

Answer: [Yes]

Justification: see the appendix.

Guidelines:

- The answer NA means that the paper does not use existing assets.
- The authors should cite the original paper that produced the code package or dataset.
- The authors should state which version of the asset is used and, if possible, include a URL.
- The name of the license (e.g., CC-BY 4.0) should be included for each asset.
- For scraped data from a particular source (e.g., website), the copyright and terms of service of that source should be provided.
- If assets are released, the license, copyright information, and terms of use in the package should be provided. For popular datasets, [paperswithcode.com/datasets](https://paperswithcode.com/datasets) has curated licenses for some datasets. Their licensing guide can help determine the license of a dataset.
- For existing datasets that are re-packaged, both the original license and the license of the derived asset (if it has changed) should be provided.



- If this information is not available online, the authors are encouraged to reach out to the asset’s creators.

### 13. New assets

Question: Are new assets introduced in the paper well documented and is the documentation provided alongside the assets?

Answer: [NA]

Justification: No new assets added.

Guidelines:

- The answer NA means that the paper does not release new assets.
- Researchers should communicate the details of the dataset/code/model as part of their submissions via structured templates. This includes details about training, license, limitations, etc.
- The paper should discuss whether and how consent was obtained from people whose asset is used.
- At submission time, remember to anonymize your assets (if applicable). You can either create an anonymized URL or include an anonymized zip file.

### 14. Crowdsourcing and research with human subjects

Question: For crowdsourcing experiments and research with human subjects, does the paper include the full text of instructions given to participants and screenshots, if applicable, as well as details about compensation (if any)?

Answer: [NA]

Justification: No human subjects.

Guidelines:

- The answer NA means that the paper does not involve crowdsourcing nor research with human subjects.
- Including this information in the supplemental material is fine, but if the main contribution of the paper involves human subjects, then as much detail as possible should be included in the main paper.
- According to the NeurIPS Code of Ethics, workers involved in data collection, curation, or other labor should be paid at least the minimum wage in the country of the data collector.

### 15. Institutional review board (IRB) approvals or equivalent for research with human subjects

Question: Does the paper describe potential risks incurred by study participants, whether such risks were disclosed to the subjects, and whether Institutional Review Board (IRB) approvals (or an equivalent approval/review based on the requirements of your country or institution) were obtained?

Answer: [NA]

Justification: no human subjects.

Guidelines:

- The answer NA means that the paper does not involve crowdsourcing nor research with human subjects.
- Depending on the country in which research is conducted, IRB approval (or equivalent) may be required for any human subjects research. If you obtained IRB approval, you should clearly state this in the paper.
- We recognize that the procedures for this may vary significantly between institutions and locations, and we expect authors to adhere to the NeurIPS Code of Ethics and the guidelines for their institution.
- For initial submissions, do not include any information that would break anonymity (if applicable), such as the institution conducting the review.

### 16. Declaration of LLM usage

730 Question: Does the paper describe the usage of LLMs if it is an important, original, or  
731 non-standard component of the core methods in this research? Note that if the LLM is used  
732 only for writing, editing, or formatting purposes and does not impact the core methodology,  
733 scientific rigorousness, or originality of the research, declaration is not required.

734 Answer: [NA]

735 Justification: LLM was used to polish the writing and to generate draft ideas for the intro-  
736 duction.

737 Guidelines:

- 738 • The answer NA means that the core method development in this research does not  
739 involve LLMs as any important, original, or non-standard components.
- 740 • Please refer to our LLM policy (<https://neurips.cc/Conferences/2025/LLM>)  
741 for what should or should not be described.

## A Extension to Multi-Token Prediction

In this section we extend our previous analysis to the broader case of functions that map an input sequence to an output sequence, rather than a single token. In particular, we consider the problem of computing a function  $f : \Sigma^* \mapsto \Gamma^*$  mapping each input sequence  $\mathbf{x} = \langle x_1, \dots, x_n \rangle$  to the output sequence  $\tilde{\mathbf{x}} = \langle \tilde{x}_1, \dots, \tilde{x}_m \rangle$ , where  $m := m(n)$  is the length of the output depending on  $n$ . As before we append the  $\perp$  token to the input  $\mathbf{x}$ .

Note that as opposed to the single token case where we only have one output token conditioned on the embedding of the  $\perp$  token, in the multi-token case we have  $m > 1$  output tokens. Hence, for any function  $f$  we can associate a sequence of single-token output functions  $\langle f_1, \dots, f_m \rangle$  where  $f_1$  maps  $\mathbf{x} \circ \perp$  to  $\tilde{x}_1$  and  $f_i$  maps  $\mathbf{x} \circ \perp \circ \tilde{x}_1 \circ \dots \circ \tilde{x}_{i-1}$  to  $\tilde{x}_i$ .

Analogously we will extend the definitions from Section 2 to the multi-token case. We will use  $z_\perp$  to denote the (last layer) embedding of the  $\perp$  token and  $z_i$  to denote the embedding of the token  $\tilde{x}_i$ .

**Definition A.1** (Multi-Token Goodness). *A model  $\mathcal{M}$  is  $(\varepsilon, \gamma)$ -good at length  $n$  with respect to distribution  $\mathcal{D}_n$  if*

$$\begin{aligned} \mathbb{P}_{\mathbf{x} \sim \mathcal{D}_n} [\exists j \in \Gamma : j \neq \tilde{x}_1 : \langle z_\perp, \mathbf{d}_j \rangle \geq \langle z_\perp, \mathbf{d}_{\tilde{x}_1} \rangle - \gamma] &\leq \varepsilon, \\ \mathbb{P}_{\mathbf{x} \sim \mathcal{D}_n} [\exists i \geq 2, \exists j \in \Gamma : j \neq \tilde{x}_i : \langle z_{i-1}, \mathbf{d}_j \rangle \geq \langle z_{i-1}, \mathbf{d}_{\tilde{x}_i} \rangle - \gamma] &\leq \varepsilon, \end{aligned}$$

where  $\mathbf{d}_j$  is the vector mapping to the output symbol  $j \in \Gamma$ . Here we call  $\gamma$  the margin at length  $n$ .

**Definition A.2** (Sparse Multi-Token Functions). *A function  $f : \Sigma^* \rightarrow \Gamma^* = \langle f_1, \dots, f_m \rangle$  is  $s$ -sparse if for each  $i \in \{1, \dots, m\}$ , the function  $f_i$  is  $s$ -sparse.*

**Definition A.3** (Perturbation Set). *For  $N > n$ , define the  $(N, n)$ -perturbation set of  $\mathcal{D}_N$  as the product distribution  $s_1 \times \dots \times s_{m(N)}$  where each  $s_i$  is an  $(N + i, n)$ -perturbation of  $f_i$ .*

We are now ready to define what it means for a transformer model for multi-token prediction to be robust.

**Definition A.4** (Multi-Token Robustness). *A model  $\mathcal{M}$  is  $(N, n)$ -multi-token-robust w.r.t.  $\mathcal{D}$  with parameters  $(\varepsilon, \gamma)$  if the model is  $(\varepsilon, \gamma)$ -multi-token good with respect to  $\mathcal{D}_n$ , and also with respect to the  $(N, n)$ -perturbation set of  $\mathcal{D}_N$ .*

With the above definitions we have the following theorem.

**Theorem A.5** (Multi-Token Generalization). *For  $c > 1$ , let  $\mathcal{M} = (E, D, K, Q, V)$  be a one-layer attention-only Transformer; assume that the encoder matrix  $E$  and decoder matrix  $D$  have unit-length columns. Suppose  $\mathcal{M}$  is  $(N, n)$ -multi-token-robust with parameters  $(\varepsilon, \gamma)$ , where  $\gamma > 2\|V\| \cdot (1 - 1/4c)$  for  $N \leq cn$ . Then  $\mathcal{M}$  is  $(O(\varepsilon \cdot (N + m(N))/n), 0)$ -good at length  $N$ .*

*Proof.* The proof very closely mirrors the proof of the single token case. Consider an input sequence  $\mathbf{x} = \langle x_1, \dots, x_N \rangle$  of length  $N$  on which the model makes a mistake. Let  $p$  be the first output position where a mistake is made. In other words the model makes a mistake at  $f_p$ . Recall that we feed the augmented sequence  $\mathbf{x} \circ \perp \circ \tilde{x}_1, \dots, \tilde{x}_{p-1}$  to the model, which returns  $\arg \max_{j \in \Gamma} \langle z_{p-1}, \mathbf{d}_j \rangle$  as the answer. (Here  $z_{p-1}$  is the embedding of  $\tilde{x}_{p-1}$  after passing through the model, and  $\mathbf{d}_j$  is the column of the decoder matrix corresponding to output symbol  $j \in \Gamma$ .) Let  $j^* = \tilde{x}_p \in \Gamma$  be the correct answer on this sequence; since the model makes a mistake on  $\mathbf{x}$ , it outputs some other symbol  $j^\dagger \in \Gamma$ ,  $j^\dagger \neq j^*$ . Let  $N' = N + p \leq N + m(N)$  be the length of the sequence that is input to the model.

The attention structure of our model ensures that the representation of  $\tilde{x}_{p-1}$  token must be

$$z_{p-1} = \frac{\sum_{i=1}^{N'} \exp(\langle K e_{x_i}, Q e_{p-1} \rangle) \cdot V e_{x_i}}{\sum_{i=1}^{N'} \exp(\langle K e_{x_i}, Q e_{p-1} \rangle)} = \frac{\sum_{i=1}^{N'} w_i \mathbf{v}_i}{\sum_{i=1}^{N'} w_i},$$

where  $e_{x_i}$  is the encoding of the symbol  $x_i$  and  $e_{p-1}$  that of  $\tilde{x}_{p-1}$ , and we use  $\mathbf{v}_i = V e_{x_i}$  and  $w_i = \exp(\langle K e_{x_i}, Q e_{p-1} \rangle) \geq 0$  to reduce notation. Define  $\alpha_i := \langle \mathbf{v}_i, \mathbf{d}_{j^*} - \mathbf{d}_{j^\dagger} \rangle$ . Since each of the  $\mathbf{e}_i, \mathbf{d}_j$  vectors has unit length, we have the following upper bound on  $\alpha_i$ :

$$\alpha_i = \langle \mathbf{v}_i, \mathbf{d}_{j^*} - \mathbf{d}_{j^\dagger} \rangle = \langle V e_{x_i}, \mathbf{d}_{j^*} - \mathbf{d}_{j^\dagger} \rangle \leq 2\|V\|. \quad (6)$$

784 Now, since the model errs on  $\mathbf{x}$  and outputs  $j^\dagger$  instead of  $j^\star = f(\mathbf{x})$ , we have

$$0 \geq \langle \hat{z}_{p-1}, \mathbf{d}_{j^\star} - \mathbf{d}_{j^\dagger} \rangle = \frac{\sum_{i \in A(\mathbf{x})} w_i \alpha_i + \sum_{i \in [N'] \setminus A(\mathbf{x})} w_i \alpha_i}{\sum_{i \in [N']} w_i}, \quad (7)$$

785 where  $A(\mathbf{x})$  is the sparse set for the function  $f_p$ . Now, suppose the model errs at length  $N'$  with  
 786 probability  $\delta$ . We want to show the following claim: *conditioned on making an error (say on*  
 787 *sequence  $\mathbf{x}$ ), the probability that the margin is less than  $\gamma$  on the  $(N', n)$ -perturbation of  $\mathcal{D}$  is at*  
 788 *least  $\delta p/2$ , where  $p = \frac{n}{N'-s} \geq \frac{n}{N'} \geq \frac{1}{c}$ .* Indeed, by assumption, we know this probability of small  
 789 margin must be smaller than  $\varepsilon$ , so  $\delta \cdot n/(2N') \leq \delta p/2 \leq \varepsilon$ , so  $\delta \leq \varepsilon \cdot (2N'/n)$ , proving the theorem.

790 Now we prove the claim. Define  $Q' := \{i \in [N'] \setminus A(\mathbf{x}) \mid \alpha_i < 0\}$  to be the indices of the negative  
 791 terms in the numerator of (7) but outside the anchor set and let  $P' := [N'] \setminus Q'$ .  $P'$  thus contains  
 792 either the indices of the non-negative terms in the numerator of (7) or indices that are in the anchor  
 793 set (hence retained in the perturbation with probability 1). We focus on this numerator and regroup  
 794 terms to get:

$$\sum_{i \in P'} w_i \alpha_i \leq \sum_{i \in Q'} w_i |\alpha_i|. \quad (8)$$

795 Recall the definition of the  $(N', n)$ -perturbation of the sequence: it retains all the  $s$  tokens that  
 796 “force” the correct output  $j^\star$  (i.e., samples them with probability 1) and samples each other token  
 797 independently with probability  $p$ . Let  $Y_i$  be the indicator r.v. for the token  $\sigma_i$  with  $i \in [N']$  being  
 798 sampled, and let  $\tilde{\mathbf{x}}$  denote the (random) shorter subsequence obtained from  $\mathbf{x}$  by restricting to the  
 799 sampled indices (and  $\hat{z}_{p-1}$  being the r.v. denoting the embedding of  $\tilde{x}_{p-1}$  token on this input).  
 800 Consider the outcomes of  $\{Y_i\}$  for  $i \in P'$ , and let us condition on their values being  $Y_i = y_i$ ; this  
 801 gives us

$$\langle \hat{z}_{p-1}, \mathbf{d}_{j^\star} - \mathbf{d}_{j^\dagger} \rangle = \frac{\sum_{i \in P'} w_i \alpha_i y_i - \sum_{i \in Q'} w_i |\alpha_i| Y_i}{\sum_{i \in P'} w_i y_i + \sum_{i \in Q'} w_i Y_i}. \quad (9)$$

802 Now, we consider the sum  $S := \sum_{i \in P'} w_i \alpha_i y_i$ . If  $S \leq 0$ , then we are done since it means the model  
 803 made an error at length  $n$  and hence the small margin claim holds vacuously. Therefore, we focus  
 804 on  $S > 0$ . Now define  $a_i := w_i |\alpha_i|/S$  for  $i \in Q'$ ; observe that  $\sum_{i \in Q'} a_i \geq 1$  because of (8). Hence  
 805 the  $a_i$  values and the associated i.i.d. random variables  $Y_i$  satisfy the conditions of Theorem 3.2,  
 806 which implies that  $\Pr[\sum_{i \in Q'} w_i |\alpha_i| Y_i \geq Sp/4] \geq p/2$ . Moreover,  $\sum_{i \in Q'} w_i Y_i \geq 0$  always holds  
 807 for any indicator r.v.’s  $Y_i$  in  $Q'$ . Substituting these back into (9), we get that conditioned on  $\mathcal{M}$   
 808 making a mistake on  $\mathbf{x}$ , and for any conditioning  $Y_i = y_i$  for the r.v.’s in  $P'$ , the following upper  
 809 bound on the margin holds w.p. at least  $p/2$ :

$$\langle \hat{z}_{p-1}, \mathbf{d}_{j^\star} - \mathbf{d}_{j^\dagger} \rangle \leq \frac{(1 - p/4) \cdot \sum_{i \in P'} w_i \alpha_i y_i}{\sum_{i \in P'} w_i y_i} \stackrel{(6)}{\leq} 2\|V\| \cdot \left(1 - \frac{p}{4}\right) \leq 2\|V\| \cdot \left(1 - \frac{1}{4c}\right). \quad \square$$

## 810 B Experiment Details

811 All our experiments are conducted using the Jax Flaxformer codebase and involve training decoder  
 812 only Transformer models from scratch. For training the baseline models, we partition the training  
 813 dataset for the main task into batches of a specified size (see details below) and use the AdamW  
 814 optimizer. We run our models for a prespecified number of gradient steps. To set the learning rate,  
 815 we start with a learning rate of zero and linearly ramp up to a prespecified base learning rate over  
 816 10 epochs. Following that we anneal the learning rate to zero using the standard cosine learning  
 817 rate scheduler (with one cycle); see Table 1. We train all our models for 200,000 gradient steps (the  
 818 in-distribution performance saturates much before that for all the tasks). Besides the four main tasks  
 819 mentioned in the main body, we also experiment with two additional tasks: the task of copying a  
 820 sequence and the task of computing the parity of a given binary sequence.

## 821 C Dataset Details

### 822 C.1 Sorting

823 We generate training data for the main task and the auxiliary tasks for sequences up to length 20.  
 824 For the main task we first pick a length value  $\ell$  uniformly at random in the range  $[4, 20]$ . Given  $\ell$ ,

| Parameter                         | Value                                                                     |
|-----------------------------------|---------------------------------------------------------------------------|
| Embedding size ( $d$ )            | 1024                                                                      |
| Vocabulary size ( $q$ )           | 103 (for sorting, SLiM)<br>200 (for reversal, increment, copy and parity) |
| Position embedding type           | None                                                                      |
| # Attention heads ( $h$ )         | 16                                                                        |
| MLP inner dimensionality ( $d'$ ) | 2048                                                                      |
| Sequence length                   | 512                                                                       |
| Base learning rate                | 1e-5                                                                      |
| Optimizer                         | AdamW                                                                     |
| LR warmup                         | Linear for 10 epochs                                                      |
| LR decay schedule                 | Cosine, one cycle with default parameters                                 |
| Dropout                           | None                                                                      |
| Activation                        | GELU                                                                      |
| Depth                             | 2 (for sorting)<br>4 (for SLiM, reversal, increment, copy and parity)     |

Table 1: Hyperparameters for the experiments.

with probability 0.8 we generate a length  $\ell$  sequence by picking each of the  $\ell$  numbers i.i.d from the vocabulary  $V = \{1, \dots, 100\}$ . With probability 0.2 we generate the sequence from a shortened vocabulary  $V'$  that is a random subset of  $V$  of size  $\ell/2$ . This ensures that we train the models to do well even on inputs with repetitions. To generate a training data point for the auxiliary task, we simply generate a sequence of length  $N = 100$  at random following the same process as above and then pick an output position  $i$  uniformly at random. We fix the relevant tokens needed to predict the token following position  $i$  and subsample with probability  $n/N$ . We generate 100M examples for the main task and 100M examples for the auxiliary task.

## C.2 Increment

We generate training data for the main task and the auxiliary tasks for sequences up to length 20. For the main task we first pick a length value  $\ell$  uniformly at random in the range  $[4, 20]$ . Given  $\ell$ , with probability 0.8 we generate a length  $\ell$  sequence by picking the number at the most significant position uniformly at random from  $\{1, \dots, 9\}$  and each of the remaining  $\ell - 1$  numbers i.i.d from the vocabulary  $V = \{0, 1, 2, \dots, 9\}$ . With probability 0.2 we generate a random sequence that ends with a suffix of 9's where the suffix length is chosen to be uniform between  $[1, \ell/2]$ . This ensures that the models learn the *carry* operation faithfully. To generate a training data point for the auxiliary task we simply generate a sequence of length  $N = 60$  at random following the same process as above and then pick an output position  $i$  uniformly at random. We fix the relevant tokens needed to predict the token following position  $i$  and subsample with probability  $n/N$ . As mentioned in Section 4 we also augment the training sequence with *pos*, *val*, *sum*, and *carry* tokens to keep track of the current position information. In order for the models to be able to handle lengths larger than the ones seen during training, we generate *pos* values by sampling a position at random in the range  $[0, 80]$  and incrementing it by one for each new digit in the sequence. We also follow the standard practice of producing the output in reverse order, i.e., least significant digit first. We generate 100M examples for the main task and 100M examples for the auxiliary task.

## C.3 Reversal

We generate training data for the main task and the auxiliary tasks for sequences up to length 20. For the main task we first pick a length value  $\ell$  uniformly at random in the range  $[4, 20]$ . Given  $\ell$ , we generate a length  $\ell$  sequence by picking the  $\ell$  numbers i.i.d from the vocabulary  $V = \{0, 1, \dots, 100\}$ . To generate a training data point for the auxiliary task we simply generate a sequence of length  $N = 60$  at random following the same process as above and then pick an output position  $i$  uniformly at random. We fix the relevant tokens needed to predict the token following position  $i$  and subsample with probability  $n/N$ . As mentioned in Section 4 we also augment the training sequence with *pos* and *val* tokens to keep track of the current position information. In order for the models

to be able to handle lengths larger than the ones seen during training, we generate  $pos$  values by sampling a position uniformly at random in the range  $[0, 80]$  and incrementing it by one for each new digit in the sequence. We generate 100M examples for the main task and 100M examples for the auxiliary task.

#### C.4 SLiM

We generate training data for the main task and the auxiliary tasks for sequences up to length 20. For the main task we first pick a length value  $\ell$  uniformly at random in the range  $[4, 20]$ . We pick a seed sequence of length 4 by picking two random tokens from class A and two random tokens from class B. Given the seed sequence  $\ell$ , we generate a length  $\ell$  output sequence by following the latent (deterministic) rule for the SLiM task. To generate a training data point for the auxiliary task we simply generate a sequence of length  $N = 60$  at random following the same process as above and then pick an output position  $i$  uniformly at random. We fix the relevant tokens needed to predict the token following position  $i$  and subsample with probability  $n/N$ . We generate 1M examples for the main task and 100M examples for the auxiliary task.

## D Additional Synthetic Tasks

### D.1 Copy

This task is similar to the reversal task except that one is required to copy the input as opposed to reverse it. See Figure 7 for an example. We generate training data for the main task and the auxiliary tasks for sequences up to length 20. For the main task we first pick a length value  $\ell$  uniformly at random in the range  $[4, 20]$ . Given  $\ell$ , we generate a length  $\ell$  sequence by picking the  $\ell$  numbers i.i.d from the vocabulary  $V = \{0, 1, \dots, 100\}$ . To generate a training data point for the auxiliary task we simply generate a sequence of length  $N = 60$  at random following the same process as above and then pick an output position  $i$  uniformly at random. We fix the relevant tokens needed to predict the token following position  $i$  and subsample with probability  $n/N$ . Similar to the reversal task we also augment the training sequence with  $pos$  and  $val$  tokens to keep track of the current position information. In order for the models to be able to handle lengths larger than the ones seen during training, we generate  $pos$  values by sampling a position uniformly at random in the range  $[0, 80]$  and incrementing it by one for each new digit in the sequence. We generate 100M examples for the main task and 100M examples for the auxiliary task.

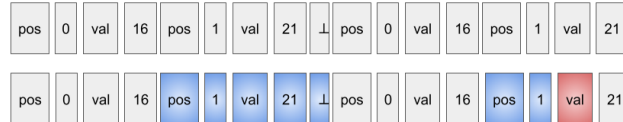

Figure 7: An example of the copy main task and an auxiliary task.

### D.2 Parity

In this task given a sequence of  $n$  bits we are required to compute  $n$  parity bits where the  $i$ th output bit must equal the parity of the first  $i$  bits of the input. See Figure 8 for an example. We generate training data for the main task and the auxiliary tasks for sequences up to length 20. For the main task we first pick a length value  $\ell$  uniformly at random in the range  $[4, 20]$ . Given  $\ell$ , we generate a length  $\ell$  sequence by picking the  $\ell$  numbers i.i.d from the vocabulary  $V = \{0, 1\}$ . The output sequence corresponds to the sequential parity of every prefix of the input. To generate a training data point for the auxiliary task we simply generate a sequence of length  $N = 60$  at random following the same process as above and then pick an output position  $i$  uniformly at random. We fix the relevant tokens needed to predict the token following position  $i$  and subsample with probability  $n/N$ . Similar to the reversal task we also augment the training sequence with  $pos$  and  $val$  tokens to keep track of the current position information. Furthermore we also use the  $xor$  token to keep track of the parity of the prefix computed so far. In order for the models to be able to handle lengths larger than the ones seen during training, we generate  $pos$  values by sampling a position uniformly at random in

the range  $[0, 80]$  and incrementing it by one for each new digit in the sequence. We generate 100M examples for the main task and 100M examples for the auxiliary task.

|     |   |     |   |     |   |     |   |   |     |   |     |   |     |   |     |   |     |   |     |   |
|-----|---|-----|---|-----|---|-----|---|---|-----|---|-----|---|-----|---|-----|---|-----|---|-----|---|
| pos | 0 | val | 1 | pos | 1 | val | 1 | ⊥ | pos | 0 | val | 1 | xor | 1 | pos | 1 | val | 1 | xor | 0 |
| pos | 0 | val | 1 | pos | 1 | val | 1 | ⊥ | pos | 0 | val | 1 | xor | 1 | pos | 1 | val | 1 | xor | 0 |

Figure 8: An example of the parity main task and an auxiliary task.

### D.3 Results

The results for the copy task and the parity task are presented in Figure 9 below. These additional results further support the effectiveness of our training recipe for better length generalization.

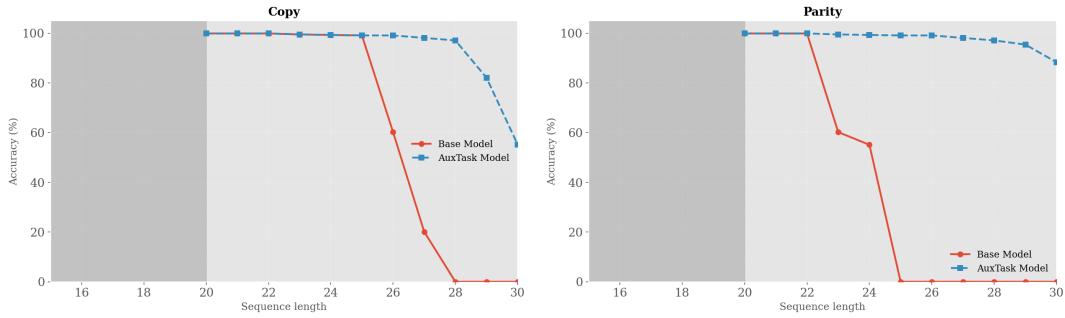

Figure 9: A comparison of the length generalization performance of the baseline training method vs. the proposed auxiliary task based method on the copy and the parity tasks. The  $x$ -axis represents the sequence length and the  $y$ -axis is the exact match (EM) accuracy. The shaded region represents the sequence lengths used during training and the non-shaded region represents the sequence lengths that the model does not see during training time.
